# Supplementary material for: Proteomic Analysis of Embryogenesis and the Acquisition of Seed Dormancy in Norway Maple (Acer platanoides L.)
Source: Int J Mol Sci. 2014 Jun 17;15(6):10868–91. doi: 10.3390/ijms150610868 (PMC4100186; doi:10.3390/ijms150610868)
Supplement: Supplementary File 1 — Supplementary File (XLS, 92 KB) [file ijms-15-10868-s001.xls]

## Sheet: Arkusz2
Supplemental Table S1. List of all peptides for each protein spots. Raw data for parental peptides from Mascot search results is presented.
Spot no.a	Assignment	Species	gi No.	Peptide sequence
Morphogenesis
Cellular processes
8	copper/zinc-superoxide dismutase	Litchi chinensis	gi|164654158	K.EHGAPEDENR.H
				R.AVVVHSDPDDLGK.G
				R.AVVVHSDPDDLGK.G
				R.AVVVHSDPDDLGK.G
				R.AVVVHSDPDDLGK.G
				R.AVVVHSDPDDLGK.G
				R.AVVVHSDPDDLGK.G
				R.AVVVHSDPDDLGK.G
				R.AVVVHSDPDDLGK.G
				R.AVVVHSDPDDLGK.G
				R.AVVVHSDPDDLGK.G
				R.AVVVHSDPDDLGK.G
				R.AVVVHSDPDDLGK.G
				R.AVVVHSDPDDLGK.G
				R.LACGVIGLQA.-
154	actin	Boehmeria nivea	gi|255115691	K.CDVDIR.K
				K.CDVDIR.K
				K.CDVDIR.K
				K.CDVDIRK.D
				K.AGFAGDDAPR.A
				K.AGFAGDDAPR.A
				R.HTGVMVGMGQK.D
				R.HTGVMVGMGQK.D
				K.EITALAPSSMK.I
				R.HTGVMVGMGQK.D + Oxidation (M)
				R.HTGVMVGMGQK.D + Oxidation (M)
				R.HTGVMVGMGQK.D + Oxidation (M)
				R.HTGVMVGMGQK.D + Oxidation (M)
				R.HTGVMVGMGQK.D + Oxidation (M)
				K.EITALAPSSMK.I + Oxidation (M)
				K.EITALAPSSMK.I + Oxidation (M)
				R.GYMFTTTAER.E
				R.HTGVMVGMGQK.D + 2 Oxidation (M)
				R.HTGVMVGMGQK.D + 2 Oxidation (M)
				K.DAYVGDEAQSK.R
				K.DAYVGDEAQSK.R
				K.DAYVGDEAQSK.R
				K.DAYVGDEAQSK.R
				K.DAYVGDEAQSK.R
				K.DAYVGDEAQSK.R
				K.DAYVGDEAQSK.R
				K.DAYVGDEAQSK.R
				R.GYMFTTTAER.E + Oxidation (M)
				R.GYMFTTTAER.E + Oxidation (M)
				R.GYMFTTTAER.E + Oxidation (M)
				R.GYMFTTTAER.E + Oxidation (M)
				R.GYMFTTTAER.E + Oxidation (M)
				R.GYMFTTTAER.E + Oxidation (M)
				R.AVFPSIVGRPR.H
				K.DAYVGDEAQSKR.G
				K.GEYDESGPSIVHR.K
				K.GEYDESGPSIVHR.K
				K.GEYDESGPSIVHR.K
				K.GEYDESGPSIVHR.K
				R.LDLAGRDLTDSLMK.I
				K.NYELPDGQIITIGAER.F
				K.NYELPDGQIITIGAER.F
				K.NYELPDGQIITIGAER.F
				K.NYELPDGQIITIGAER.F
				K.NYELPDGQIITIGAER.F
				K.NYELPDGQIITIGAER.F
				K.NYELPDGQIITIGAER.F
				K.NYELPDGQIITIGAER.F
				K.NYELPDGQIITIGAER.F
				K.NYELPDGQIITIGAER.F
				K.NYELPDGQIITIGAER.F
				K.NYELPDGQIITIGAER.F
				K.NYELPDGQIITIGAER.F
				K.LAYVALDYEQELETAK.S
				K.LAYVALDYEQELETAK.S
				K.LAYVALDYEQELETAK.S
				K.LAYVALDYEQELETAK.S
				K.LAYVALDYEQELETAK.S
				K.LAYVALDYEQELETAK.S
				K.LAYVALDYEQELETAK.S
				K.LAYVALDYEQELETAK.S
				K.LAYVALDYEQELETAK.S
				K.LAYVALDYEQELETAK.S
				K.LAYVALDYEQELETAK.S
				K.LAYVALDYEQELETAK.S
				K.LAYVALDYEQELETAK.S
				K.LAYVALDYEQELETAK.S
				K.LAYVALDYEQELETAK.S
				K.LAYVALDYEQELETAK.S
				K.LAYVALDYEQELETAK.S
				K.YPIEHGIVSNWDDMEK.I
				K.YPIEHGIVSNWDDMEK.I
				K.YPIEHGIVSNWDDMEK.I + Oxidation (M)
				K.YPIEHGIVSNWDDMEK.I + Oxidation (M)
				K.YPIEHGIVSNWDDMEK.I + Oxidation (M)
				K.YPIEHGIVSNWDDMEK.I + Oxidation (M)
				K.YPIEHGIVSNWDDMEK.I + Oxidation (M)
				R.VAPEEHPVLLTEAPLNPK.A
				M.ADAEDIQPLVCDNGTGMVK.A + Oxidation (M)
				K.DLYGNIVLSGGSTMFPGIADR.M + Oxidation (M)
				R.KDLYGNIVLSGGSTMFPGIADR.M + Oxidation (M)
				R.TTGIVLDSGDGVSHTVPIYEGYALPHAILR.L
				R.CPEVLFQPSLIGMEAAGIHETTYNSIMK.C + 2 Oxidation (M)
171	tubulin alpha chain	Ricinus communis	gi|255552898	R.LSVDYGK.K
				K.FDLMYAK.R
				K.FDLMYAK.R
				K.FDLMYAK.R + Oxidation (M)
				R.LSVDYGKK.S
				K.DVNAAVATIK.T
				K.DVNAAVATIK.T
				K.DVNAAVATIK.T
				K.DVNAAVATIK.T
				K.DVNAAVATIK.T
				K.EDAANNFAR.G
				K.YMACCLMYR.G
				K.YMACCLMYR.G + Oxidation (M)
				K.YMACCLMYR.G + Oxidation (M)
				K.YMACCLMYR.G + 2 Oxidation (M)
				R.IDHKFDLMYAK.R
				R.QLFHPEQLISGK.E
				R.TIQFVDWCPTGFK.C
				R.TIQFVDWCPTGFK.C
				R.TIQFVDWCPTGFK.C
				R.TIQFVDWCPTGFK.C
				R.TIQFVDWCPTGFK.C
				R.SLDIERPTYTNLNR.L
				R.SLDIERPTYTNLNR.L
				R.AVFLDLEPTVIDEVR.T
				R.AVFLDLEPTVIDEVR.T
				R.AVFLDLEPTVIDEVR.T
				R.AVFLDLEPTVIDEVR.T
				R.AVFLDLEPTVIDEVR.T
				R.AVFLDLEPTVIDEVR.T
				R.AVFLDLEPTVIDEVR.T
				K.RTIQFVDWCPTGFK.C
				R.IHFMLSSYAPVISAEK.A
				R.IHFMLSSYAPVISAEK.A
				R.IHFMLSSYAPVISAEK.A + Oxidation (M)
				R.IHFMLSSYAPVISAEK.A + Oxidation (M)
				R.AVCMISNSTSVAEVFSR.I
				R.AVCMISNSTSVAEVFSR.I
				R.AVCMISNSTSVAEVFSR.I
				R.AVCMISNSTSVAEVFSR.I + Oxidation (M)
				R.AVCMISNSTSVAEVFSR.I + Oxidation (M)
				R.AVCMISNSTSVAEVFSR.I + Oxidation (M)
				K.CGINYQPPTVVPGGDLAK.V
				K.CGINYQPPTVVPGGDLAK.V
				K.CGINYQPPTVVPGGDLAK.V
				K.TVGGGDDAFNTFFSETGAGK.H
				K.TVGGGDDAFNTFFSETGAGK.H
				K.TVGGGDDAFNTFFSETGAGK.H
				K.TVGGGDDAFNTFFSETGAGK.H
				K.TVGGGDDAFNTFFSETGAGK.H
				K.TVGGGDDAFNTFFSETGAGK.H
				K.TVGGGDDAFNTFFSETGAGK.H
				K.DYEEVGAESAEGDDDEGDEY.-
				K.DYEEVGAESAEGDDDEGDEY.-
				K.DYEEVGAESAEGDDDEGDEY.-
				K.DYEEVGAESAEGDDDEGDEY.-
				K.DYEEVGAESAEGDDDEGDEY.-
				K.DYEEVGAESAEGDDDEGDEY.-
				K.DYEEVGAESAEGDDDEGDEY.-
				K.DYEEVGAESAEGDDDEGDEY.-
				K.DYEEVGAESAEGDDDEGDEY.-
				K.DYEEVGAESAEGDDDEGDEY.-
				R.AFVHWYVGEGMEEGEFSEAR.E + Oxidation (M)
				R.AFVHWYVGEGMEEGEFSEAR.E + Oxidation (M)
				R.AFVHWYVGEGMEEGEFSEAR.E + Oxidation (M)
174	alpha tubulin	Betula pendula	gi|214003725	R.LSVDYGK.K
				K.FDLMYAK.R
				K.FDLMYAK.R
				K.FDLMYAK.R + Oxidation (M)
				K.FDLMYAK.R + Oxidation (M)
				R.LSVDYGKK.S
				K.DVNAAVATIK.T
				K.DVNAAVATIK.T
				K.DVNAAVATIK.T
				K.DVNAAVATIK.T
				K.DVNAAVATIK.T
				K.DVNAAVATIK.T
				K.DVNAAVATIK.T
				K.DVNAAVATIK.T
				K.DVNAAVATIK.T
				K.DVNAAVATIK.T
				K.DVNAAVATIK.T
				K.DVNAAVATIK.T
				K.DVNAAVATIK.T
				K.DVNAAVATIK.T
				K.DVNAAVATIK.T
				K.DVNAAVATIK.T
				K.DVNAAVATIK.T
				K.DVNAAVATIK.T
				K.DVNAAVATIK.T
				K.DVNAAVATIK.T
				K.DVNAAVATIK.T
				K.DVNAAVATIK.T
				K.DVNAAVATIK.T
				K.EDAANNFAR.G
				K.EDAANNFAR.G
				K.EDAANNFAR.G
				K.YMACCLMYR.G
				K.YMACCLMYR.G + Oxidation (M)
				K.YMACCLMYR.G + Oxidation (M)
				K.YMACCLMYR.G + 2 Oxidation (M)
				R.QLFHPEQLISGK.E
				R.QLFHPEQLISGK.E
				R.QLFHPEQLISGK.E
				R.LVSQVISSLTASLR.F
				R.LVSQVISSLTASLR.F
				R.LVSQVISSLTASLR.F
				R.LVSQVISSLTASLR.F
				R.LVSQVISSLTASLR.F
				R.LVSQVISSLTASLR.F
				R.LVSQVISSLTASLR.F
				R.LVSQVISSLTASLR.F
				R.LVSQVISSLTASLR.F
				R.LVSQVISSLTASLR.F
				R.LVSQVISSLTASLR.F
				R.LVSQVISSLTASLR.F
				R.LVSQVISSLTASLR.F
				R.LVSQVISSLTASLR.F
				R.LVSQVISSLTASLR.F
				R.LVSQVISSLTASLR.F
				R.LVSQVISSLTASLR.F
				R.LVSQVISSLTASLR.F
				R.LVSQVISSLTASLR.F
				R.LVSQVISSLTASLR.F
				R.TIQFVDWCPTGFK.C
				R.TIQFVDWCPTGFK.C
				R.TIQFVDWCPTGFK.C
				R.TIQFVDWCPTGFK.C
				R.TIQFVDWCPTGFK.C
				R.TIQFVDWCPTGFK.C
				R.TIQFVDWCPTGFK.C
				R.TIQFVDWCPTGFK.C
				R.TIQFVDWCPTGFK.C
				R.TIQFVDWCPTGFK.C
				R.TIQFVDWCPTGFK.C
				R.SLDIERPTYTNLNR.L
				R.SLDIERPTYTNLNR.L
				R.SLDIERPTYTNLNR.L
				R.SLDIERPTYTNLNR.L
				R.SLDIERPTYTNLNR.L
				R.SLDIERPTYTNLNR.L
				R.AVFVDLEPTVIDEVR.T
				R.AVFVDLEPTVIDEVR.T
				R.AVFVDLEPTVIDEVR.T
				R.AVFVDLEPTVIDEVR.T
				R.AVFVDLEPTVIDEVR.T
				R.AVFVDLEPTVIDEVR.T
				R.AVFVDLEPTVIDEVR.T
				R.AVFVDLEPTVIDEVR.T
				R.AVFVDLEPTVIDEVR.T
				R.AVFVDLEPTVIDEVR.T
				R.AVFVDLEPTVIDEVR.T
				R.AVFVDLEPTVIDEVR.T
				R.AVFVDLEPTVIDEVR.T
				R.AVFVDLEPTVIDEVR.T
				R.AVFVDLEPTVIDEVR.T
				R.AVFVDLEPTVIDEVR.T
				R.AVFVDLEPTVIDEVR.T
				R.AVFVDLEPTVIDEVR.T
				K.RTIQFVDWCPTGFK.C
				R.IHFMLSSYAPVISAEK.A
				R.IHFMLSSYAPVISAEK.A
				R.IHFMLSSYAPVISAEK.A + Oxidation (M)
				R.IHFMLSSYAPVISAEK.A + Oxidation (M)
				R.IHFMLSSYAPVISAEK.A + Oxidation (M)
				R.IHFMLSSYAPVISAEK.A + Oxidation (M)
				R.IHFMLSSYAPVISAEK.A + Oxidation (M)
				R.RSLDIERPTYTNLNR.L
				R.AVCMISNSTSVAEVFSR.I
				R.AVCMISNSTSVAEVFSR.I
				R.AVCMISNSTSVAEVFSR.I
				R.AVCMISNSTSVAEVFSR.I
				R.AVCMISNSTSVAEVFSR.I
				R.AVCMISNSTSVAEVFSR.I
				R.AVCMISNSTSVAEVFSR.I
				R.AVCMISNSTSVAEVFSR.I
				R.AVCMISNSTSVAEVFSR.I
				R.AVCMISNSTSVAEVFSR.I + Oxidation (M)
				R.AVCMISNSTSVAEVFSR.I + Oxidation (M)
				R.AVCMISNSTSVAEVFSR.I + Oxidation (M)
				R.AVCMISNSTSVAEVFSR.I + Oxidation (M)
				R.AVCMISNSTSVAEVFSR.I + Oxidation (M)
				R.AVCMISNSTSVAEVFSR.I + Oxidation (M)
				R.AVCMISNSTSVAEVFSR.I + Oxidation (M)
				R.AVCMISNSTSVAEVFSR.I + Oxidation (M)
				R.AVCMISNSTSVAEVFSR.I + Oxidation (M)
				R.AVCMISNSTSVAEVFSR.I + Oxidation (M)
				R.AVCMISNSTSVAEVFSR.I + Oxidation (M)
				R.AVCMISNSTSVAEVFSR.I + Oxidation (M)
				R.AVCMISNSTSVAEVFSR.I + Oxidation (M)
				R.AVCMISNSTSVAEVFSR.I + Oxidation (M)
				R.AVCMISNSTSVAEVFSR.I + Oxidation (M)
				R.AVCMISNSTSVAEVFSR.I + Oxidation (M)
				R.AVCMISNSTSVAEVFSR.I + Oxidation (M)
				K.CGINYQPPTVVPGGDLAK.V
				K.CGINYQPPTVVPGGDLAK.V
				K.CGINYQPPTVVPGGDLAK.V
				K.TVGGGDDAFNTFFSETGAGK.H
				K.TVGGGDDAFNTFFSETGAGK.H
				K.TVGGGDDAFNTFFSETGAGK.H
				K.TVGGGDDAFNTFFSETGAGK.H
				K.TVGGGDDAFNTFFSETGAGK.H
				K.TVGGGDDAFNTFFSETGAGK.H
				K.TVGGGDDAFNTFFSETGAGK.H
				K.TVGGGDDAFNTFFSETGAGK.H
				K.TVGGGDDAFNTFFSETGAGK.H
				K.TVGGGDDAFNTFFSETGAGK.H
				K.TVGGGDDAFNTFFSETGAGK.H
				K.TVGGGDDAFNTFFSETGAGK.H
				K.TVGGGDDAFNTFFSETGAGK.H
				K.TVGGGDDAFNTFFSETGAGK.H
				K.TVGGGDDAFNTFFSETGAGK.H
				K.TVGGGDDAFNTFFSETGAGK.H
				K.DYEEVGAESAEGEDDEGDEY.-
				K.DYEEVGAESAEGEDDEGDEY.-
				K.DYEEVGAESAEGEDDEGDEY.-
				K.DYEEVGAESAEGEDDEGDEY.-
				K.DYEEVGAESAEGEDDEGDEY.-
				K.DYEEVGAESAEGEDDEGDEY.-
				K.DYEEVGAESAEGEDDEGDEY.-
				K.DYEEVGAESAEGEDDEGDEY.-
				R.AFVHWYVGEGMEEGEFSEAR.E
				R.AFVHWYVGEGMEEGEFSEAR.E
				R.AFVHWYVGEGMEEGEFSEAR.E + Oxidation (M)
				R.AFVHWYVGEGMEEGEFSEAR.E + Oxidation (M)
				R.AFVHWYVGEGMEEGEFSEAR.E + Oxidation (M)
				R.AFVHWYVGEGMEEGEFSEAR.E + Oxidation (M)
				R.FDGALNVDVTEFQTNLVPYPR.I
				R.FDGALNVDVTEFQTNLVPYPR.I
				K.AYHEQLSVAEITNSAFEPSSMMAK.C
				K.AYHEQLSVAEITNSAFEPSSMMAK.C
				K.AYHEQLSVAEITNSAFEPSSMMAK.C + Oxidation (M)
				K.AYHEQLSVAEITNSAFEPSSMMAK.C + Oxidation (M)
				K.AYHEQLSVAEITNSAFEPSSMMAK.C + Oxidation (M)
				K.AYHEQLSVAEITNSAFEPSSMMAK.C + Oxidation (M)
				K.AYHEQLSVAEITNSAFEPSSMMAK.C + 2 Oxidation (M)
				K.AYHEQLSVAEITNSAFEPSSMMAK.C + 2 Oxidation (M)
				K.AYHEQLSVAEITNSAFEPSSMMAK.C + 2 Oxidation (M)
				K.AYHEQLSVAEITNSAFEPSSMMAK.C + 2 Oxidation (M)
				K.AYHEQLSVAEITNSAFEPSSMMAK.C + 2 Oxidation (M)
175	tubulin beta-7 chain	Zea mays	gi|162460038	R.YLTASAMFR.G
				R.YLTASAMFR.G
				K.NMMCAADPR.H
				K.NMMCAADPR.H + 2 Oxidation (M)
				K.NMMCAADPR.H + 2 Oxidation (M)
				K.LAVNLIPFPR.L
				R.FPGQLNSDLR.K
				R.VSEQFTAMFR.R
				R.VSEQFTAMFR.R
				R.VSEQFTAMFR.R
				R.VSEQFTAMFR.R + Oxidation (M)
				R.VSEQFTAMFR.R + Oxidation (M)
				R.VSEQFTAMFR.R + Oxidation (M)
				R.VSEQFTAMFR.R + Oxidation (M)
				R.KLAVNLIPFPR.L
				R.INVYYNEASGGR.F
				R.INVYYNEASGGR.F
				R.MMLTFSVFPSPK.V + Oxidation (M)
				R.MMLTFSVFPSPK.V + 2 Oxidation (M)
				K.EVDEQMLNVQNK.N
				K.EVDEQMLNVQNK.N
				K.EVDEQMLNVQNK.N
				K.EVDEQMLNVQNK.N + Oxidation (M)
				K.EVDEQMLNVQNK.N + Oxidation (M)
				K.EVDEQMLNVQNK.N + Oxidation (M)
				K.EVDEQMLNVQNK.N + Oxidation (M)
				R.AVLMDLEPGTMDSVR.S
				R.AVLMDLEPGTMDSVR.S
				R.LHFFMVGFAPLTSR.G + Oxidation (M)
				R.LHFFMVGFAPLTSR.G + Oxidation (M)
				R.AVLMDLEPGTMDSVR.S + Oxidation (M)
				R.AVLMDLEPGTMDSVR.S + Oxidation (M)
				R.AVLMDLEPGTMDSVR.S + Oxidation (M)
				R.AVLMDLEPGTMDSVR.S + 2 Oxidation (M)
				R.AVLMDLEPGTMDSVR.S + 2 Oxidation (M)
				R.AVLMDLEPGTMDSVR.S + 2 Oxidation (M)
				K.NSSYFVEWIPNNVK.S
				R.ALTVPELTQQMWDSK.N
				R.ALTVPELTQQMWDSK.N
				R.ALTVPELTQQMWDSK.N
				R.ALTVPELTQQMWDSK.N
				R.ALTVPELTQQMWDSK.N + Oxidation (M)
				R.ALTVPELTQQMWDSK.N + Oxidation (M)
				R.ALTVPELTQQMWDSK.N + Oxidation (M)
				R.ALTVPELTQQMWDSK.N + Oxidation (M)
				R.ALTVPELTQQMWDSK.N + Oxidation (M)
				R.EILHIQGGQCGNQIGAK.F
				R.EILHIQGGQCGNQIGAK.F
				K.MSSTFVGNSTSIQEMFR.R
				K.MSSTFVGNSTSIQEMFR.R
				K.MSSTFVGNSTSIQEMFR.R + Oxidation (M)
				K.MSSTFVGNSTSIQEMFR.R + Oxidation (M)
				K.GHYTEGAELIDSVLDVVR.K
183	tubulin beta chain	Ricinus communis	gi|255558856	R.YLTASAMFR.G
				K.NMMCAADPR.H
				K.NMMCAADPR.H + 2 Oxidation (M)
				K.NMMCAADPR.H + 2 Oxidation (M)
				K.LAVNLIPFPR.L
				K.LAVNLIPFPR.L
				R.FPGQLNSDLR.K
				R.VSEQFTAMFR.R
				R.VSEQFTAMFR.R
				R.VSEQFTAMFR.R
				R.VSEQFTAMFR.R
				R.VSEQFTAMFR.R
				R.VSEQFTAMFR.R + Oxidation (M)
				R.VSEQFTAMFR.R + Oxidation (M)
				R.VSEQFTAMFR.R + Oxidation (M)
				R.VSEQFTAMFR.R + Oxidation (M)
				R.VSEQFTAMFR.R + Oxidation (M)
				R.VSEQFTAMFR.R + Oxidation (M)
				R.VSEQFTAMFR.R + Oxidation (M)
				R.VSEQFTAMFR.R + Oxidation (M)
				R.VSEQFTAMFR.R + Oxidation (M)
				R.VSEQFTAMFR.R + Oxidation (M)
				R.VSEQFTAMFR.R + Oxidation (M)
				R.VSEQFTAMFR.R + Oxidation (M)
				R.VSEQFTAMFR.R + Oxidation (M)
				R.VSEQFTAMFR.R + Oxidation (M)
				R.VSEQFTAMFR.R + Oxidation (M)
				R.VSEQFTAMFR.R + Oxidation (M)
				R.VSEQFTAMFR.R + Oxidation (M)
				R.VSEQFTAMFR.R + Oxidation (M)
				R.VSEQFTAMFR.R + Oxidation (M)
				R.VSEQFTAMFR.R + Oxidation (M)
				R.VSEQFTAMFR.R + Oxidation (M)
				R.VSEQFTAMFR.R + Oxidation (M)
				R.VSEQFTAMFR.R + Oxidation (M)
				R.VSEQFTAMFR.R + Oxidation (M)
				R.VSEQFTAMFR.R + Oxidation (M)
				R.VSEQFTAMFR.R + Oxidation (M)
				R.VSEQFTAMFR.R + Oxidation (M)
				R.VSEQFTAMFR.R + Oxidation (M)
				R.KLAVNLIPFPR.L
				K.STVCDIPPTGLK.M
				K.STVCDIPPTGLK.M
				K.STVCDIPPTGLK.M
				R.YDGDTDLQLER.I
				R.YDGDTDLQLER.I
				R.YDGDTDLQLER.I
				R.YDGDTDLQLER.I
				R.YDGDTDLQLER.I
				R.YDGDTDLQLER.I
				R.YDGDTDLQLER.I
				R.YDGDTDLQLER.I
				R.YDGDTDLQLER.I
				R.YDGDTDLQLER.I
				R.YDGDTDLQLER.I
				R.YDGDTDLQLER.I
				R.YDGDTDLQLER.I
				R.YDGDTDLQLER.I
				R.YDGDTDLQLER.I
				R.MMLTFSVFPSPK.V
				R.MMLTFSVFPSPK.V + Oxidation (M)
				R.MMLTFSVFPSPK.V + Oxidation (M)
				R.MMLTFSVFPSPK.V + 2 Oxidation (M)
				R.INVYYNEASCGR.F
				R.INVYYNEASCGR.F
				R.INVYYNEASCGR.F
				R.INVYYNEASCGR.F
				R.INVYYNEASCGR.F
				R.INVYYNEASCGR.F
				R.INVYYNEASCGR.F
				R.INVYYNEASCGR.F
				R.INVYYNEASCGR.F
				R.INVYYNEASCGR.F
				R.INVYYNEASCGR.F
				K.EVDEQMLNVQNK.N
				K.EVDEQMLNVQNK.N
				K.EVDEQMLNVQNK.N + Oxidation (M)
				K.EVDEQMLNVQNK.N + Oxidation (M)
				K.EVDEQMLNVQNK.N + Oxidation (M)
				K.EVDEQMLNVQNK.N + Oxidation (M)
				K.EVDEQMLNVQNK.N + Oxidation (M)
				K.EVDEQMLNVQNK.N + Oxidation (M)
				K.EVDEQMLNVQNK.N + Oxidation (M)
				R.LHFFMVGFAPLTSR.G
				R.AVLMDLEPGTMDSVR.S
				R.AVLMDLEPGTMDSVR.S
				R.AVLMDLEPGTMDSVR.S
				R.LHFFMVGFAPLTSR.G + Oxidation (M)
				R.LHFFMVGFAPLTSR.G + Oxidation (M)
				R.AVLMDLEPGTMDSVR.S + Oxidation (M)
				R.AVLMDLEPGTMDSVR.S + Oxidation (M)
				R.AVLMDLEPGTMDSVR.S + Oxidation (M)
				R.AVLMDLEPGTMDSVR.S + 2 Oxidation (M)
				R.AVLMDLEPGTMDSVR.S + 2 Oxidation (M)
				R.AVLMDLEPGTMDSVR.S + 2 Oxidation (M)
				R.AVLMDLEPGTMDSVR.S + 2 Oxidation (M)
				R.AVLMDLEPGTMDSVR.S + 2 Oxidation (M)
				R.AVLMDLEPGTMDSVR.S + 2 Oxidation (M)
				K.NSSYFVEWIPNNVK.S
				K.NSSYFVEWIPNNVK.S
				K.NSSYFVEWIPNNVK.S
				K.NSSYFVEWIPNNVK.S
				R.ALTVPELTQQMWDSK.N
				R.ALTVPELTQQMWDSK.N
				R.ALTVPELTQQMWDSK.N
				R.ALTVPELTQQMWDSK.N
				R.ALTVPELTQQMWDSK.N
				R.ALTVPELTQQMWDSK.N
				R.ALTVPELTQQMWDSK.N
				R.ALTVPELTQQMWDSK.N + Oxidation (M)
				R.ALTVPELTQQMWDSK.N + Oxidation (M)
				R.ALTVPELTQQMWDSK.N + Oxidation (M)
				R.ALTVPELTQQMWDSK.N + Oxidation (M)
				R.ALTVPELTQQMWDSK.N + Oxidation (M)
				R.ALTVPELTQQMWDSK.N + Oxidation (M)
				R.ALTVPELTQQMWDSK.N + Oxidation (M)
				R.ALTVPELTQQMWDSK.N + Oxidation (M)
				K.FWEVVCAEHGIDSTGR.Y
				K.FWEVVCAEHGIDSTGR.Y
				K.MASTFIGNSTSIQEMFR.R
				K.MASTFIGNSTSIQEMFR.R
				K.MSTKEVDEQMLNVQNK.N + 2 Oxidation (M)
				K.MASTFIGNSTSIQEMFR.R + Oxidation (M)
				K.MASTFIGNSTSIQEMFR.R + Oxidation (M)
				K.MASTFIGNSTSIQEMFR.R + Oxidation (M)
				K.MASTFIGNSTSIQEMFR.R + 2 Oxidation (M)
				K.MASTFIGNSTSIQEMFR.R + 2 Oxidation (M)
				K.MASTFIGNSTSIQEMFR.R + 2 Oxidation (M)
				K.MASTFIGNSTSIQEMFR.R + 2 Oxidation (M)
				K.MASTFIGNSTSIQEMFR.R + 2 Oxidation (M)
				K.GHYTEGAELIDSVLDVVR.K
				K.EAENCDCLQGFQVCHSLGGGTGSGMGTLLISK.I + Oxidation (M)
Genetic information processing
1	nonspecific lipid transfer protein	Vitis vinifera	gi|359486799	R.SLNAAASTTADR.Q
73	RuBisCO large subunit-binding protein subunit beta, chloroplastic	Pisum sativum	gi|2506277	K.VGADIVK.R
				K.LLLVDKK.I
				K.VGADIVKR.A
				K.VLSSDNPK.Y
				K.YGYNAATGK.Y
				R.VEDALNATK.A
				R.VEDALNATK.A
				R.VEDALNATK.A
				R.VEDALNATK.A
				K.IVNDGVTVAK.E
				K.IVNDGVTVAK.E
				R.KGVVTLEEGK.S
				R.KGVVTLEEGK.S
				K.NAGVNGSVVSEK.V
				K.NAGVNGSVVSEK.V
				K.NAGVNGSVVSEK.V
				K.NAGVNGSVVSEK.V
				K.LADLVGVTLGPK.G
				K.LADLVGVTLGPK.G
				K.LADLVGVTLGPK.G
				K.LADLVGVTLGPK.G
				K.LADLVGVTLGPK.G
				K.LADLVGVTLGPK.G
				K.LADLVGVTLGPK.G
				K.LRVEDALNATK.A
				K.LRVEDALNATK.A
				K.LRVEDALNATK.A
				K.LRVEDALNATK.A
				K.LRVEDALNATK.A
				R.CCLEHASSVAK.T
				K.VVAAGANPVLITR.G
				K.VVAAGANPVLITR.G
				K.VVAAGANPVLITR.G
				K.VVAAGANPVLITR.G
				K.VVAAGANPVLITR.G
				K.VVAAGANPVLITR.G
				K.VVAAGANPVLITR.G
				K.VVAAGANPVLITR.G
				K.VVAAGANPVLITR.G
				K.VVAAGANPVLITR.G
				K.VVAAGANPVLITR.G
				K.VVAAGANPVLITR.G
				K.VVAAGANPVLITR.G
				K.VVAAGANPVLITR.G
				K.VVAAGANPVLITR.G
				K.VVAAGANPVLITR.G
				K.VVAAGANPVLITR.G
				K.VVAAGANPVLITR.G
				K.VVAAGANPVLITR.G
				K.VVAAGANPVLITR.G
				K.VVAAGANPVLITR.G
				R.DLINILEDAIR.S
				R.DLINILEDAIR.S
				R.GYISPYFVTDSEK.M
				R.GYISPYFVTDSEK.M
				R.GYISPYFVTDSEK.M
				R.GYISPYFVTDSEK.M
				R.GYISPYFVTDSEK.M
				R.GYISPYFVTDSEK.M
				R.GYISPYFVTDSEK.M
				R.GYISPYFVTDSEK.M
				R.GYISPYFVTDSEK.M
				K.YEDLMAAGIIDPTK.V
				K.YEDLMAAGIIDPTK.V
				K.YEDLMAAGIIDPTK.V
				K.EVELEDPVENIGAK.L
				K.EVELEDPVENIGAK.L
				K.EVELEDPVENIGAK.L
				K.EVELEDPVENIGAK.L
				K.EVELEDPVENIGAK.L
				K.EVELEDPVENIGAK.L
				K.EVELEDPVENIGAK.L
				K.EVELEDPVENIGAK.L
				K.EVELEDPVENIGAK.L
				K.YEDLMAAGIIDPTK.V + Oxidation (M)
				K.YEDLMAAGIIDPTK.V + Oxidation (M)
				K.YEDLMAAGIIDPTK.V + Oxidation (M)
				K.YEDLMAAGIIDPTK.V + Oxidation (M)
				K.YEDLMAAGIIDPTK.V + Oxidation (M)
				K.VDAIKDTLANDEEK.V + Carboxymethyl (K)
				K.VDAIKDTLANDEEK.V + Carboxymethyl (K)
				K.AAVEEGIVVGGGCTLLR.L
				K.AAVEEGIVVGGGCTLLR.L
				K.AAVEEGIVVGGGCTLLR.L
				K.AAVEEGIVVGGGCTLLR.L
				K.AAVEEGIVVGGGCTLLR.L
				K.AAVEEGIVVGGGCTLLR.L
				K.AAVEEGIVVGGGCTLLR.L
				K.AAVEEGIVVGGGCTLLR.L
				K.AAVEEGIVVGGGCTLLR.L
				K.AAVEEGIVVGGGCTLLR.L
				K.AAVEEGIVVGGGCTLLR.L
				K.AAVEEGIVVGGGCTLLR.L
				K.AAVEEGIVVGGGCTLLR.L
				K.AAVEEGIVVGGGCTLLR.L
				K.AAVEEGIVVGGGCTLLR.L
				K.AAVEEGIVVGGGCTLLR.L
				K.AAVEEGIVVGGGCTLLR.L
				K.AAVEEGIVVGGGCTLLR.L
				K.AAVEEGIVVGGGCTLLR.L
				K.AAVEEGIVVGGGCTLLR.L
				K.AAVEEGIVVGGGCTLLR.L
				K.AAVEEGIVVGGGCTLLR.L
				K.AAVEEGIVVGGGCTLLR.L
				K.AAVEEGIVVGGGCTLLR.L
				K.AAVEEGIVVGGGCTLLR.L
				K.AAVEEGIVVGGGCTLLR.L
				K.AAVEEGIVVGGGCTLLR.L
				K.AAVEEGIVVGGGCTLLR.L
				K.DTTTIVGDGSTQEAVNK.R
				K.DTTTIVGDGSTQEAVNK.R
				K.DTTTIVGDGSTQEAVNK.R
				K.DTTTIVGDGSTQEAVNK.R
				K.DTTTIVGDGSTQEAVNK.R
				K.DTTTIVGDGSTQEAVNK.R
				K.DTTTIVGDGSTQEAVNK.R
				K.DTTTIVGDGSTQEAVNK.R
				K.DTTTIVGDGSTQEAVNK.R
				K.DTTTIVGDGSTQEAVNK.R
				K.DTTTIVGDGSTQEAVNK.R
				K.SQYLDDIAILTGGTVIR.E
				K.SQYLDDIAILTGGTVIR.E
				K.SQYLDDIAILTGGTVIR.E
				K.DTTTIVGDGSTQEAVNKR.V
				K.DTTTIVGDGSTQEAVNKR.V
				K.DTTTIVGDGSTQEAVNKR.V
				K.DTTTIVGDGSTQEAVNKR.V
				K.DTTTIVGDGSTQEAVNKR.V
				K.DTTTIVGDGSTQEAVNKR.V
				K.DTTTIVGDGSTQEAVNKR.V
				K.DTTTIVGDGSTQEAVNKR.V
				K.DTTTIVGDGSTQEAVNKR.V
				K.DTTTIVGDGSTQEAVNKR.V
				K.DTTTIVGDGSTQEAVNKR.V
				K.DTTTIVGDGSTQEAVNKR.V
				K.LSGGVAVIQVGAQTETELK.E
				K.LSGGVAVIQVGAQTETELK.E
				R.KSQYLDDIAILTGGTVIR.E
				R.KSQYLDDIAILTGGTVIR.E
				K.LSGGVAVIQVGAQTETELKEK.K
				K.LSGGVAVIQVGAQTETELKEK.K
				K.LSGGVAVIQVGAQTETELKEK.K
				K.LSGGVAVIQVGAQTETELKEK.K
				K.LSGGVAVIQVGAQTETELKEK.K
				K.VVLTKDTTTIVGDGSTQEAVNK.R
				K.TNDLAGDGTTTSVVLAQGLIAEGVK.V
				K.TNDLAGDGTTTSVVLAQGLIAEGVK.V
				K.TNDLAGDGTTTSVVLAQGLIAEGVK.V
				K.TNDLAGDGTTTSVVLAQGLIAEGVK.V
				K.TNDLAGDGTTTSVVLAQGLIAEGVK.V
				K.TNDLAGDGTTTSVVLAQGLIAEGVK.V
				K.TNDLAGDGTTTSVVLAQGLIAEGVK.V
				K.TNDLAGDGTTTSVVLAQGLIAEGVK.V
				K.TNDLAGDGTTTSVVLAQGLIAEGVK.V
				K.TNDLAGDGTTTSVVLAQGLIAEGVK.V
				K.TNDLAGDGTTTSVVLAQGLIAEGVK.V
				K.TNDLAGDGTTTSVVLAQGLIAEGVK.V
				K.YGYNAATGKYEDLMAAGIIDPTK.V
				K.YGYNAATGKYEDLMAAGIIDPTK.V + Oxidation (M)
				K.YGYNAATGKYEDLMAAGIIDPTK.V + Oxidation (M)
				K.YGYNAATGKYEDLMAAGIIDPTK.V + Oxidation (M)
200	RuBisCO large subunit-binding protein subunit alpha, chloroplastic	Brassica napus	gi|1351030	R.LGADIVQK.A
				R.LGADIVQK.A
				R.LGADIVQK.A
				K.VVNDGVTIAR.A
				K.VVNDGVTIAR.A
				K.VVNDGVTIAR.A
				K.VVNDGVTIAR.A
				K.VVNDGVTIAR.A
				K.VVNDGVTIAR.A
				K.VVNDGVTIAR.A
				K.VVNDGVTIAR.A
				K.VVNDGVTIAR.A
				K.VVNDGVTIAR.A
				K.VVNDGVTIAR.A
				K.VVNDGVTIAR.A
				K.VVNDGVTIAR.A
				K.VVNDGVTIAR.A
				K.LLVEFENAR.V
				K.LLVEFENAR.V
				K.LLVEFENAR.V
				K.DSTTLIADAASK.D
				K.DSTTLIADAASK.D
				K.DSTTLIADAASK.D
				K.DSTTLIADAASK.D
				K.DSTTLIADAASK.D
				K.DSTTLIADAASK.D
				K.DSTTLIADAASK.D
				K.DSTTLIADAASK.D
				K.DSTTLIADAASK.D
				K.DSTTLIADAASK.D
				K.DSTTLIADAASK.D
				K.DSTTLIADAASK.D
				K.DSTTLIADAASK.D
				K.DSTTLIADAASK.D
				K.DSTTLIADAASK.D
				K.DSTTLIADAASK.D
				K.DSTTLIADAASK.D
				R.NVVLDEFGSPK.V
				R.NVVLDEFGSPK.V
				R.NVVLDEFGSPK.V
				R.NVVLDEFGSPK.V
				R.NVVLDEFGSPK.V
				R.NVVLDEFGSPK.V
				R.NVVLDEFGSPK.V
				R.NVVLDEFGSPK.V
				R.NVVLDEFGSPK.V
				R.NVVLDEFGSPK.V
				R.NVVLDEFGSPK.V
				K.VGAATETELEDR.K
				K.VGAATETELEDR.K
				K.VGAATETELEDR.K
				K.VGAATETELEDR.K
				K.VGAATETELEDR.K
				K.VGAATETELEDR.K
				K.VGAATETELEDR.K
				K.VGAATETELEDR.K
				K.VGAATETELEDR.K
				K.VGAATETELEDR.K
				K.VGAATETELEDR.K
				K.VGAATETELEDR.K
				K.VGAATETELEDR.K
				K.VGAATETELEDR.K
				K.VGAATETELEDR.K
				K.VGAATETELEDR.K
				K.VGAATETELEDR.K
				K.VGAATETELEDR.K
				K.VGAATETELEDR.K
				K.VGAATETELEDR.K
				K.VGAATETELEDR.K
				K.VGAATETELEDR.K
				K.VGAATETELEDR.K
				K.VGAATETELEDR.K
				K.VGAATETELEDR.K
				K.VGAATETELEDR.K
				K.VGAATETELEDR.K
				K.VGAATETELEDR.K
				K.VGAATETELEDR.K
				K.VGAATETELEDR.K
				K.VGAATETELEDR.K
				K.VGAATETELEDRK.L
				K.VGAATETELEDRK.L
				K.VGAATETELEDRK.L
				K.VGAATETELEDRK.L
				R.GYISPQFVTNPEK.L
				R.GYISPQFVTNPEK.L
				R.GYISPQFVTNPEK.L
				R.GYISPQFVTNPEK.L
				R.GYISPQFVTNPEK.L
				R.GYISPQFVTNPEK.L
				R.GYISPQFVTNPEK.L
				R.GYISPQFVTNPEK.L
				R.GYISPQFVTNPEK.L
				R.GYISPQFVTNPEK.L
				K.ELSETDSVYDSEK.L
				K.ELSETDSVYDSEK.L
				K.ELSETDSVYDSEK.L
				K.ELSETDSVYDSEK.L
				K.ELSETDSVYDSEK.L
				K.ELSETDSVYDSEK.L
				K.ELSETDSVYDSEK.L
				K.ELSETDSVYDSEK.L
				K.ELSETDSVYDSEK.L
				K.ELSETDSVYDSEK.L
				K.ELSETDSVYDSEK.L
				K.ELSETDSVYDSEK.L
				K.ELSETDSVYDSEK.L
				K.ELSETDSVYDSEK.L
				K.ELSETDSVYDSEK.L
				K.ELSETDSVYDSEK.L
				K.ELSETDSVYDSEK.L
				K.ELSETDSVYDSEK.L
				K.ELSETDSVYDSEK.L
				K.ELSETDSVYDSEK.L
				K.ELSETDSVYDSEK.L
				K.ELSETDSVYDSEK.L
				K.KELSETDSVYDSEK.L
				K.KELSETDSVYDSEK.L
				K.KELSETDSVYDSEK.L
				K.TNDSAGDGTTTASVLAR.E
				K.TNDSAGDGTTTASVLAR.E
				K.TNDSAGDGTTTASVLAR.E
				K.TNDSAGDGTTTASVLAR.E
				K.TNDSAGDGTTTASVLAR.E
				K.TNDSAGDGTTTASVLAR.E
				K.TNDSAGDGTTTASVLAR.E
				K.TNDSAGDGTTTASVLAR.E
				K.TNDSAGDGTTTASVLAR.E
				K.TNDSAGDGTTTASVLAR.E
				K.TNDSAGDGTTTASVLAR.E
				K.TNDSAGDGTTTASVLAR.E
				K.TNDSAGDGTTTASVLAR.E
				K.TNDSAGDGTTTASVLAR.E
				K.TNDSAGDGTTTASVLAR.E
				K.TNDSAGDGTTTASVLAR.E
				K.TNDSAGDGTTTASVLAR.E
				K.TNDSAGDGTTTASVLAR.E
				K.TNDSAGDGTTTASVLAR.E
				K.TNDSAGDGTTTASVLAR.E
				K.TNDSAGDGTTTASVLAR.E
				K.TNDSAGDGTTTASVLAR.E
				K.TNDSAGDGTTTASVLAR.E
				K.TNDSAGDGTTTASVLAR.E
				K.TNDSAGDGTTTASVLAR.E
				K.VTISKDSTTLIADAASK.D
				K.VTISKDSTTLIADAASK.D
				K.DSTTLIADAASKDELQAR.I
				K.DSTTLIADAASKDELQAR.I
				K.DSTTLIADAASKDELQAR.I
				K.DSTTLIADAASKDELQAR.I
				K.DSTTLIADAASKDELQAR.I
				K.DSTTLIADAASKDELQAR.I
				K.DSTTLIADAASKDELQAR.I
				K.DSTTLIADAASKDELQAR.I
				K.DSTTLIADAASKDELQAR.I
				K.DSTTLIADAASKDELQAR.I
				K.DSTTLIADAASKDELQAR.I
				K.DSTTLIADAASKDELQAR.I
				K.DSTTLIADAASKDELQAR.I
				K.DSTTLIADAASKDELQAR.I
				K.DSTTLIADAASKDELQAR.I
				K.DSTTLIADAASKDELQAR.I
				K.DSTTLIADAASKDELQAR.I
				K.DSTTLIADAASKDELQAR.I
				K.DSTTLIADAASKDELQAR.I
				K.DSTTLIADAASKDELQAR.I
				K.DSTTLIADAASKDELQAR.I
				R.EVASKTNDSAGDGTTTASVLAR.E
Metabolism
27	triosephosphate isomerase, cytosolic	Coptis japonica	gi|136057	K.VIACVGETLEQR.E
				K.VIACVGETLEQR.E
				K.VIACVGETLEQR.E
				K.VIACVGETLEQR.E
				K.VIACVGETLEQR.E
				K.VIACVGETLEQR.E
				K.VIACVGETLEQR.E
				K.VIACVGETLEQR.E
				K.VIACVGETLEQR.E
				K.VIACVGETLEQR.E
				K.VIACVGETLEQR.E
				K.VIACVGETLEQR.E
				K.VIACVGETLEQR.E
				K.VIACVGETLEQR.E
				K.VIACVGETLEQR.E
				K.VIACVGETLEQR.E
				K.VIACVGETLEQR.E
				K.VIACVGETLEQR.E
				K.VIACVGETLEQR.E
				K.VIACVGETLEQR.E
				K.VIACVGETLEQR.E
				K.VIACVGETLEQR.E
				K.VIACVGETLEQR.E
				K.VIACVGETLEQR.E
				R.ALLNESNEFVGDK.T
				R.ALLNESNEFVGDK.T
				R.ALLNESNEFVGDK.T
				R.ALLNESNEFVGDK.T
				R.ALLNESNEFVGDK.T
				R.ALLNESNEFVGDK.T
				R.ALLNESNEFVGDK.T
				R.ALLNESNEFVGDK.T
				R.ALLNESNEFVGDK.T
				R.ALLNESNEFVGDK.T
				R.ALLNESNEFVGDK.T
				R.ALLNESNEFVGDK.T
				R.ALLNESNEFVGDK.T
				R.ALLNESNEFVGDK.T
				R.ALLNESNEFVGDK.T
				R.ALLNESNEFVGDK.T
				R.ALLNESNEFVGDK.T
				R.ALLNESNEFVGDK.T
				R.ALLNESNEFVGDK.T
				R.ALLNESNEFVGDK.T
				R.ALLNESNEFVGDK.T
				R.RALLNESNEFVGDK.T
				R.RALLNESNEFVGDK.T
				K.VASPAQAQEVHFELR.K
47	Alpha-1,4-glucan-protein synthase [UDP-forming]	Ricinus communis	gi|255547137	K.ASCISFK.D
				R.CFGYMVSK.K
				R.CFGYMVSK.K
				R.CFGYMVSK.K + Oxidation (M)
				R.YVDAVMTIPK.G
				R.YVDAVMTIPK.G
				R.YVDAVMTIPK.G
				R.YVDAVMTIPK.G + Oxidation (M)
				R.YVDAVMTIPK.G + Oxidation (M)
				R.YVDAVMTIPK.G + Oxidation (M)
				K.DINALEQHIK.N
				K.DINALEQHIK.N
				K.DELDIVIPTIR.N
				K.DELDIVIPTIR.N
				K.DELDIVIPTIR.N
				K.DELDIVIPTIR.N
				K.DELDIVIPTIR.N
				K.DELDIVIPTIR.N
				K.VPEGFDYELYNR.N
				K.VPEGFDYELYNR.N
				K.VPEGFDYELYNR.N
				K.VPEGFDYELYNR.N
				K.YIYTIDDDCFVAK.D
				K.YIYTIDDDCFVAK.D
				K.YIYTIDDDCFVAK.D
				K.YIYTIDDDCFVAK.D
				K.YIYTIDDDCFVAK.D
				K.YIYTIDDDCFVAK.D
				K.YIYTIDDDCFVAK.D
				K.YIYTIDDDCFVAK.D
				K.YIYTIDDDCFVAK.D
				K.YIYTIDDDCFVAK.D
				K.GTLFPMCGMNLAFNR.E + Oxidation (M)
				K.KYIYTIDDDCFVAK.D
				K.KYIYTIDDDCFVAK.D
				K.GTLFPMCGMNLAFNR.E + 2 Oxidation (M)
				K.GTLFPMCGMNLAFNR.E + 2 Oxidation (M)
				R.ELIGPAMYFGLMGDGQPIGR.Y + 2 Oxidation (M)
				R.ELIGPAMYFGLMGDGQPIGR.Y + 2 Oxidation
				R.VPFLFTIK.Q
				R.VPFLFTIK.Q
				R.VPFLFTIK.Q
				R.LTYDEIQSK.T
				R.LTYDEIQSK.T
				K.NAPPEFQNTK.L
				K.NAPPEFQNTK.L
				K.RLTYDEIQSK.T
				K.RLTYDEIQSK.T
				K.RLTYDEIQSK.T
				K.RLTYDEIQSK.T
				K.RLTYDEIQSK.T
				K.RLTYDEIQSK.T
				K.RLTYDEIQSK.T
				K.RLTYDEIQSK.T
				K.RLTYDEIQSK.T
				K.RLTYDEIQSK.T
				K.IQGIWYAQLES.-
				K.IQGIWYAQLES.-
				K.IQGIWYAQLES.-
				R.GGSTGYDNAVALPAGGR.G
				R.GGSTGYDNAVALPAGGR.G
				R.GGSTGYDNAVALPAGGR.G
				R.GGSTGYDNAVALPAGGR.G
				R.GGSTGYDNAVALPAGGR.G
				R.GGSTGYDNAVALPAGGR.G
				R.GGSTGYDNAVALPAGGR.G
				R.GGSTGYDNAVALPAGGR.G
				R.GGSTGYDNAVALPAGGR.G
				R.GGSTGYDNAVALPAGGR.G
				R.GGSTGYDNAVALPAGGR.G
				R.GGSTGYDNAVALPAGGR.G
				R.GGSTGYDNAVALPAGGR.G
				R.GGSTGYDNAVALPAGGR.G
				R.GGSTGYDNAVALPAGGR.G
				R.GGSTGYDNAVALPAGGR.G
				K.DGIDYAAVTVQLPGGER.V
				K.DGIDYAAVTVQLPGGER.V
				K.DGIDYAAVTVQLPGGER.V
				K.DGIDYAAVTVQLPGGER.V
				K.DGIDYAAVTVQLPGGER.V
				K.DGIDYAAVTVQLPGGER.V
				K.DGIDYAAVTVQLPGGER.V
				K.DGIDYAAVTVQLPGGER.V
				K.DGIDYAAVTVQLPGGER.V
				K.DGIDYAAVTVQLPGGER.V
				K.DGIDYAAVTVQLPGGER.V
				K.DGIDYAAVTVQLPGGER.V
				K.DGIDYAAVTVQLPGGER.V
				K.DGIDYAAVTVQLPGGER.V
				K.FEEKDGIDYAAVTVQLPGGER.V
				K.TKPETGEVIGVFESLQPSDTDLGAK.V
119	oxygen evolving enhancer protein 1	Litchi chinensis	gi|326467059	R.VPFLFTIK.Q
				R.VPFLFTIK.Q
				R.VPFLFTIK.Q
				R.LTYDEIQSK.T
				R.LTYDEIQSK.T
				K.NAPPEFQNTK.L
				K.NAPPEFQNTK.L
				K.RLTYDEIQSK.T
				K.RLTYDEIQSK.T
				K.RLTYDEIQSK.T
				K.RLTYDEIQSK.T
				K.RLTYDEIQSK.T
				K.RLTYDEIQSK.T
				K.RLTYDEIQSK.T
				K.RLTYDEIQSK.T
				K.RLTYDEIQSK.T
				K.RLTYDEIQSK.T
				K.IQGIWYAQLES.-
				K.IQGIWYAQLES.-
				K.IQGIWYAQLES.-
				R.GGSTGYDNAVALPAGGR.G
				R.GGSTGYDNAVALPAGGR.G
				R.GGSTGYDNAVALPAGGR.G
				R.GGSTGYDNAVALPAGGR.G
				R.GGSTGYDNAVALPAGGR.G
				R.GGSTGYDNAVALPAGGR.G
				R.GGSTGYDNAVALPAGGR.G
				R.GGSTGYDNAVALPAGGR.G
				R.GGSTGYDNAVALPAGGR.G
				R.GGSTGYDNAVALPAGGR.G
				R.GGSTGYDNAVALPAGGR.G
				R.GGSTGYDNAVALPAGGR.G
				R.GGSTGYDNAVALPAGGR.G
				R.GGSTGYDNAVALPAGGR.G
				R.GGSTGYDNAVALPAGGR.G
				R.GGSTGYDNAVALPAGGR.G
				K.DGIDYAAVTVQLPGGER.V
				K.DGIDYAAVTVQLPGGER.V
				K.DGIDYAAVTVQLPGGER.V
				K.DGIDYAAVTVQLPGGER.V
				K.DGIDYAAVTVQLPGGER.V
				K.DGIDYAAVTVQLPGGER.V
				K.DGIDYAAVTVQLPGGER.V
				K.DGIDYAAVTVQLPGGER.V
				K.DGIDYAAVTVQLPGGER.V
				K.DGIDYAAVTVQLPGGER.V
				K.DGIDYAAVTVQLPGGER.V
				K.DGIDYAAVTVQLPGGER.V
				K.DGIDYAAVTVQLPGGER.V
				K.DGIDYAAVTVQLPGGER.V
				K.FEEKDGIDYAAVTVQLPGGER.V
				K.TKPETGEVIGVFESLQPSDTDLGAK.V
222	Cytochrome b6-f complex iron-sulfur subunit, chloroplastic	Pisum sativum	gi|136707	K.GDPTYLVVEK.D
				K.GDPTYLVVEKDR.T
244	triosephosphate isomerase, cytosolic	Zea mays	gi|226495391	K.VIACVGETLEQR.E
				R.EAGSTMDVVAAQTK.A + Oxidation (M)
252	fructose-bisphosphate aldolase, putative	Ricinus communis	gi|255581400	R.ALQNTCLK.K
				K.AAQEALLIR.A
				K.AAQEALLIR.A
				K.AAQEALLIR.A
				K.AAQEALLIR.A
				K.AAQEALLIR.A
				K.AAQEALLIR.A
				K.AAQEALLIR.A
				K.AAQEALLIR.A
				K.AAQEALLIR.A
				K.AAQEALLIR.A
				K.AAQEALLIR.A
				K.AAQEALLIR.A
				R.TAAYYEQGAR.F
				R.ATPEQVADYTLK.L
				R.LASIGLENTEANR.Q
				R.LASIGLENTEANR.Q
				R.LASIGLENTEANR.Q
				R.LASIGLENTEANR.Q
				R.LASIGLENTEANR.Q
				R.LASIGLENTEANR.Q
				R.LASIGLENTEANR.Q
				R.LASIGLENTEANR.Q
				R.LASIGLENTEANR.Q
				R.LASIGLENTEANR.Q
				R.LASIGLENTEANR.Q
				R.LASIGLENTEANR.Q
				R.LASIGLENTEANR.Q
				R.LASIGLENTEANR.Q
				R.LASIGLENTEANR.Q
				R.LASIGLENTEANR.Q
				R.LASIGLENTEANR.Q
				R.LASIGLENTEANR.Q
				R.LASIGLENTEANR.Q
				R.TVVSIPNGPSALAVK.E
				R.TVVSIPNGPSALAVK.E
				R.GILAMDESNATCGK.R
				R.GILAMDESNATCGK.R + Oxidation (M)
				R.GILAMDESNATCGK.R + Oxidation (M)
				K.RLASIGLENTEANR.Q
				K.RLASIGLENTEANR.Q
				K.MVDVLVEQNIVPGIK.V + Oxidation (M)
Unclassified
203	protein disulfide-isomerase	Vitis vinifera	gi|225459587	K.KIAPEYEK.A
				K.QSGPASAEIK.S
				K.KQSGPASAEIK.S
				K.YHEVAEQYK.G
				K.YHEVAEQYK.G
				K.NVLVEFYAPWCGHCK.K
				K.YLKPNLEPDHIAPWVK.E
				K.YLKPNLEPDHIAPWVK.E
254	unknown	Populus trichocarpa	gi|118484746	R.ASGYDVESSASGDAILK.A
Maturation
Metabolism
32	glutathione S-transferase	Catharanthus roseus	gi|67973220	R.VFACLYEK.D
				R.VFACLYEK.D
				R.VFACLYEK.D
				R.VFACLYEK.D
				R.VFACLYEK.D
				R.VFACLYEK.D
				R.VFACLYEK.D
				R.VFACLYEK.D
				R.VFACLYEK.D
				R.VFACLYEK.D
				R.VFACLYEK.D
				R.VFACLYEK.D
				R.VFACLYEK.D
				R.VFACLYEK.D
				R.VFACLYEK.D
				R.VFACLYEK.D
				R.VFACLYEK.D
				R.VFACLYEK.D
				R.VFACLYEK.D
				R.VFACLYEK.D
				R.VFACLYEK.D
				R.VFACLYEK.D
189	monodehydroascorbate reductase (MDAR), chloroplastic	Vitis vinifera	gi|359474156	R.EFVIVGGGNAAGYAAR.T
				R.EFVIVGGGNAAGYAAR.T
				R.EFVIVGGGNAAGYAAR.T
				R.EFVIVGGGNAAGYAAR.T
				R.EFVIVGGGNAAGYAAR.T
				R.EFVIVGGGNAAGYAAR.T
				R.EFVIVGGGNAAGYAAR.T
				R.LPGFHTCVGSGGER.Q
				K.YGSLIIATGCTASR.L
				K.YGSLIIATGCTASR.L
				K.YGSLIIATGCTASR.L
				K.YGSLIIATGCTASR.L
				K.YGSLIIATGCTASR.L
				K.YGSLIIATGCTASR.L
				K.YGSLIIATGCTASR.L
				K.YGSLIIATGCTASR.L
				K.YGSLIIATGCTASR.L
				K.YGSLIIATGCTASR.L
				K.YGSLIIATGCTASR.L
				K.YGSLIIATGCTASR.L
				K.YGSLIIATGCTASR.L
				K.YGSLIIATGCTASR.L
				K.YGSLIIATGCTASR.L
				K.YGSLIIATGCTASR.L
				K.YGSLIIATGCTASR.L
				R.VFEYEGSPR.K
				K.GVLLESGSPEEFQLLPK.L
222	triosephosphate isomerase	Gossypium hirsutum	gi|295687231	K.LVSDLNSAK.L
				K.GGAFTGEISVEQLK.D
				K.GPEFATIVNSVTSK.K
				K.GPEFATIVNSVTSK.K
				K.QEDIDGFLVGGASLK.G
242	peptide methionine sulfoxid reductase-like	Vitis vinifera	gi|225454994	K.IVTEILPAK.K
				R.KIVTEILPAK.K
				K.IVTEILPAKK.F
				R.QGNDVGTQYR.S
				R.AEEYHQQYLEK.G
				R.SGIYFYTPEQEK.A
263	glyceraldehyde-3-phosphate dehydrogenase, cytosolic	Taxus baccata	gi|3023813	R.SSIFDAK.A
				K.IGINGFGR.I
				K.KVVISAPSK.D
				K.AGIALNDNFVK.L
391	lactoylglutathione lyase	Vitis vinifera	gi|359483362	R.QPGPIPGLNTK.I
				K.TVLVDNEDFLK.E
				R.GPTPEPLCQVMLR.V
				R.GPTPEPLCQVMLR.V + Oxidation (M)
				K.SAEVVNLVTKELGGK.I
				K.SAEVVNLVTKELGGK.I
400	ascorbate peroxidase	Retama raetam	gi|24496465	K.HAANAGLVNALK.L
				K.HAANAGLVNALK.L
				R.LPDAGPPSPADHLR.Q
				K.DGPGAPGGQSWTAQWLK.F
401	succinate semialdehyde dehydrogenase, putative	Ricinus communis	gi|255577875	K.ITFTGSTAVGK.K
				R.EEVFGPVAPILR.F
				K.APDIGDALLASPQVR.K
402	enolase	Spinacia oleracea	gi|8919731	K.SCNALLLK.V
				K.VQIVGDDLLVTNPK.R
				K.VQIVGDDLLVTNPK.R
				K.VNQIGSVTESIEAVK.M
				K.TYDLNFKEENNDGSQK.I
				K.YGQDATNVGDEGGFAPNIQENK.E
407	enolase	Alnus glutinosa	gi|3023685	R.DGGSDYLGK.G
				K.VQIVGDDLLVTNPK.R
				K.VNQIGSVTESIEAVK.M
				R.AAVPSGASTGVYEALELR.D
				R.AAVPSGASTGVYEALELR.D
				K.LAMQEFMILPVGASSFK.E + 2 Oxidation (M)
408	proline iminopeptidase	Vitis vinifera	gi|359475506	R.IILFDQR.G
				K.RLNSDDMETQYAAAR.A + Oxidation (M)
				R.LNSDDMETQYAAAR.A
				R.LNSDDMETQYAAAR.A + Oxidation (M)
450	enolase	Arabidopsis lyrata subsp. lyrata	gi|297820024	R.DGGSDYLGK.G
				K.SCNALLLK.V
				K.VQIVGDDLLVTNPK.R
				K.VQIVGDDLLVTNPK.R
				K.VNQIGSVTESIEAVK.M
479	fructose-bisphosphate aldolase, cytoplasmic	Zea mays	gi|162462282	K.NAAYIGTPGK.G
				K.GILAADESTGTIGK.R
				K.VTPEVIAEYTVR.T
				K.GILAADESTGTIGKR.L
491	isovaleryl-CoA dehydrogenase	Beta vulgaris	gi|112005099	K.TDITAGSK.G
				K.GITAFIIEK.G
				K.GMPGFSTAQK.L
				K.LYEIGAGTSEIR.R
				K.VADMFTSLQSSR.S + Oxidation (M)
				K.GVYVMMSGLDLER.L
				K.ESVAQFANENIAPHASK.I
531	cytosolic aldolase	Fragaria x ananassa	gi|10645188	K.YADELIK.N
				K.NAAYIGTPGK.G
				K.LGEGAAESLHVK.D
				K.LGEGAAESLHVK.D
				K.GILAADESTGTIGK.R
				K.ANSEATLGTYKGDAK.L
Genetic information processing
14	60S ribosomal protein L22, putative	Ricinus communis	gi|255551787	K.IMDIASLEK.F
				K.IMDIASLEK.F + Oxidation (M)
				K.AGALGDSVTVTR.E
				K.AGALGDSVTVTR.E
				K.ITVTSDSNFSK.R
				K.ITVTSDSNFSKR.Y
				K.GATFTIDCAKPVEDK.I
18	40 S Ribosomal protein	Vitis vinifera	gi|225465502	K.VVGCSCVVVK.D
				K.VVGCSCVVVK.D
				K.VVGCSCVVVK.D
				K.VVGCSCVVVK.D
				K.VVGCSCVVVK.D
				K.VVGCSCVVVK.D
				K.VVGCSCVVVK.D
				K.VVGCSCVVVK.D
				K.VVGCSCVVVK.D
				K.VVGCSCVVVK.D
				K.TLGEWAGLCK.I
				K.TLGEWAGLCK.I
				K.TLGEWAGLCK.I
				K.TLGEWAGLCK.I
				R.GLHEGAKVIEK.H
				R.KVVGCSCVVVK.D
				R.KVVGCSCVVVK.D
				R.KVVGCSCVVVK.D
				R.KVVGCSCVVVK.D
				R.KVVGCSCVVVK.D
				R.KVVGCSCVVVK.D
				K.ALCADHNVSLITVPSAK.T
				K.ALCADHNVSLITVPSAK.T
90	proteasome subunit alpha	Ricinus communis	gi|255583952	R.TLVQQAR.N
				K.DSVCVVTQK.K
				R.LFQVEYAFK.A
				K.EQEAINFLEK.K
				K.YLGLLATGMTADAR.T + Oxidation (M)
134	glycine-rich RNA-binding protein	Prunus avium	gi|34851124	R.DAIEGMNGQNLDGR.N + Oxidation (M)
				R.DAIEGMNGQNLDGR.N + Oxidation (M)
				R.NITVNEAQSR.G
395	P0 ribosomal protein-like	Solanum tuberosum	gi|78191424	R.GDSVVLMGK.N + Oxidation (M)
				K.VGSSEAALLAK.L
				K.GTVEIITPVELIK.K
				K.FAVAAAPAAAAGSGAAPAAAK.E
				K.FAVAAAPAAAAGSGAAPAAAK.E
397	P0 ribosomal protein-like	Solanum tuberosum	gi|78191424	R.GDSVVLMGK.N + Oxidation (M)
				K.VGSSEAALLAK.L
				K.GDLKEVSEEVAK.Y
				K.GTVEIITPVELIK.K
				K.FAVAAAPAAAAGSGAAPAAAK.E
				K.FAVAAAPAAAAGSGAAPAAAK.E
				K.FAVAAAPAAAAGSGAAPAAAK.E
				K.FAVAAAPAAAAGSGAAPAAAKEEEK.K
396	60S acidic ribosomal protein P0	Lupinus luteus	gi|1710585	R.GDSVVLMGK.N + Oxidation (M)
				K.VGSSEAALLAK.L
				K.GTVEIITPVELIK.K
403	26S protease regulatory subunit 6A homolog	Brassica rapa	gi|3024434	K.GVLLYGPPGTGK.T
				K.LAGPQLVQMFIGDGAK.L + Oxidation (M)
				K.DSYLILDTLPSEYDSR.V
494	putative 60S acidic ribosomal protein P0	Trifolium pratense	gi|84468360	R.GDSVVLMGK.N + Oxidation (M)
				K.EFLKDPSK.F
				K.VGSSEAALLAK.L
				K.GTVEIITPVELIK.K
518	proteasome subunit beta type-2-A-like	Vitis vinifera	gi|359479647	R.GELATALR.K
				K.IMVLDSHK.L + Oxidation (M)
				R.LVVAPPNFVIK.I
				R.NGIPLTTAAAANFTR.G
				K.SNEDKIMVLDSHK.L + Oxidation (M)
521	60S ribosomal protein L23a	Nicotiana tabacum	gi|585876	K.YPLTTESAMK.K + Oxidation (M)
				R.LTPDYDALDVANK.I
Cellular processes
179	alpha tubulin	Plantago major	gi|106879605	R.AVCMISNSTSVAEVFSR.I
				R.AVCMISNSTSVAEVFSR.I + Oxidation (M)
253	Charged multivesicular body protein 4b, putative	Ricinus communis	gi|255546239	K.QETNALTTLDK.L
				K.LNETLEMLEK.K + Oxidation (M)
				R.AAIQCLK.R
				K.ATTETVDALR.T
				K.ATNIDDVDKTMDEINEQTENMK.Q + 2 Oxidation (M)
Unclasified
213	type IIIa membrane protein cp-wap13	Vigna unguiculata	gi|2218152	K.VPEGFDYELYNR.N
				K.YIYTIDDDCFVAK.D
443	late embryogenesis abundant protein D-34-like	Brachypodium distachyon	gi|357115298	K.VKISEALEAAAR.A + Carboxymethyl (K
Unknown
434	unknown	Zea mays	gi|259490380	K.ILMQLAK.Q + Oxidation (M)
435	Unknown	Ricinus communis	gi|255575865	R.VALVNYGK.D
				R.ALVDAPDMVR.S + Oxidation (M)
				R.AALNDFDR.F
506	unknown	Pseudotsuga menziesii	gi|205830697	.TNAENEFVTIK.K

## Sheet: Arkusz3
K.VIACVGETLEQR.E
K.VIACVGETLEQR.E
K.VIACVGETLEQR.E
K.VIACVGETLEQR.E
K.VIACVGETLEQR.E
K.VIACVGETLEQR.E
K.VIACVGETLEQR.E
K.VIACVGETLEQR.E
K.VIACVGETLEQR.E
K.VIACVGETLEQR.E
K.VIACVGETLEQR.E
K.VIACVGETLEQR.E
K.VIACVGETLEQR.E
K.VIACVGETLEQR.E
K.VIACVGETLEQR.E
K.VIACVGETLEQR.E
K.VIACVGETLEQR.E
K.VIACVGETLEQR.E
K.VIACVGETLEQR.E
K.VIACVGETLEQR.E
K.VIACVGETLEQR.E
K.VIACVGETLEQR.E
K.VIACVGETLEQR.E
K.VIACVGETLEQR.E
R.ALLNESNEFVGDK.T
R.ALLNESNEFVGDK.T
R.ALLNESNEFVGDK.T
R.ALLNESNEFVGDK.T
R.ALLNESNEFVGDK.T
R.ALLNESNEFVGDK.T
R.ALLNESNEFVGDK.T
R.ALLNESNEFVGDK.T
R.ALLNESNEFVGDK.T
R.ALLNESNEFVGDK.T
R.ALLNESNEFVGDK.T
R.ALLNESNEFVGDK.T
R.ALLNESNEFVGDK.T
R.ALLNESNEFVGDK.T
R.ALLNESNEFVGDK.T
R.ALLNESNEFVGDK.T
R.ALLNESNEFVGDK.T
R.ALLNESNEFVGDK.T
R.ALLNESNEFVGDK.T
R.ALLNESNEFVGDK.T
R.ALLNESNEFVGDK.T
R.RALLNESNEFVGDK.T
R.RALLNESNEFVGDK.T
K.VASPAQAQEVHFELR.K
